# Supplementary material for: Sedimentary blue carbon dynamics based on chronosequential observations in a tropical restored mangrove forest
Source: Copernicus journal article supplement (doi:10.5194/bg-20-911-2023), 2023-03-03
Supplement: Supplementary file 1 [file bg-20-911-2023-supplement.pdf]

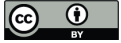

*Supplement of*

## **Sedimentary blue carbon dynamics based on chronosequential observations in a tropical restored mangrove forest**

**Raghab Ray et al.**

*Correspondence to:* Raghab Ray ([raghab.ray@gmail.com](mailto:raghab.ray@gmail.com), [raghab.ray@ori.u-tokyo.ac.jp](mailto:raghab.ray@ori.u-tokyo.ac.jp))

The copyright of individual parts of the supplement might differ from the article licence.

1  
2  
3  
4  
5  
6  
7  
8  
9  
10  
11  
12  
13  
14  
15  
16  
17  
18  
19  
20  
21  
22  
23  
24

*In situ* water column profiles of temperature (°C), salinity, dissolved oxygen saturation (DO, %) were acquired at every sampling station using an AAQ-RINKO water quality profiler (JFE-Advantech, Japan) prior to water sampling. pH of water was measured using a hand-held pH meter (HORIBA). Niskin sampler was used for collection of water samples from subsurface depth (5 L, General Oceanics, USA). Water samples were pre-filtered through a 200µm sieve attached to a plastic funnel and collected into polypropylene containers and kept on ice until further treatment. A known volume of water sample (~2 L) was filtered onto a pre-weighed and pre-combusted (450°C, 3h) 47mm glass fiber filters (Whatman GF/F, pore size 0.7µm) for particulate organic carbon (POC) and isotope analyses. DOC samples were further filtered through single-use disc filters (ADVANTEC, hydrophilic PTFE of 0.45 µm pore size) attached to 50 mL glass syringe and collected in amber vials (teflon-lined caps). DOC samples were preserved after addition of 2M HCl until pH decreased to 2.

Table S1. Endmember values used for Bayesian mixing model. POM: particulate organic matter. MPB and green leaf data are taken from Ray et al., (2018) and Nordhaus et al., (2017), respectively. RA: *Rhizophora apiculata*

| <b>Endmember</b>  | <b>δ<sup>13</sup>C ‰</b> | <b>OC:TN</b> |
|-------------------|--------------------------|--------------|
| Marine POM        | -22.8±0.5                | 7.41±1.2     |
| River POM         | -25.5±0.5                | 6.76±0.7     |
| Green leaf (RA)   | -28.5±0.26               | 30.30±1.3    |
| Microphytobenthos | -20.9±05                 | 8.82±2       |
| <b>Sediment</b>   |                          |              |
| Bare sediment     | -25.07±0.6               | 21.9±3.1     |
| Pioneer mangrove  | -25.1±1.4                | 13.3±2.8     |
| Young mangrove    | -26.9±0.8                | 19.8±0.6     |
| Adult mangrove    | -27.9±0.8                | 12.6±5.8     |
| Mature mangrove   | -28.9±0.8                | 17.4±7.1     |

25

26 Table S2. Surface water carbon and other parameters at selected sampling points of the Aklan  
27 River.

| Location | Latitude | Longitude | Neap Tide | T <sub>w</sub> (°C) | Salinity | pH   | DO % | POC (μmol/L) | POC:PN atomic | DOC (μmol/L) | δ <sup>13</sup> C <sub>POC</sub> ‰ |
|----------|----------|-----------|-----------|---------------------|----------|------|------|--------------|---------------|--------------|------------------------------------|
| Upstream | 11.7234N | 122.3767E | Ebb       | 31                  | 0        | 7.63 | 89   | 20.3         | 6.76          | 90.3         | -25.9                              |
| Channel  | 11.7200N | 122.3942E | Flood     | 28.7                | 25       | 8.05 | 105  | 23.0         | 8.22          | 81.1         | -23.7                              |
| Offshore | 11.7135N | 122.4067E | Flood     | 27.4                | 33       | 8.11 | 101  | 10.2         | 7.40          | 86.5         | -22.8                              |

28

29

30

31

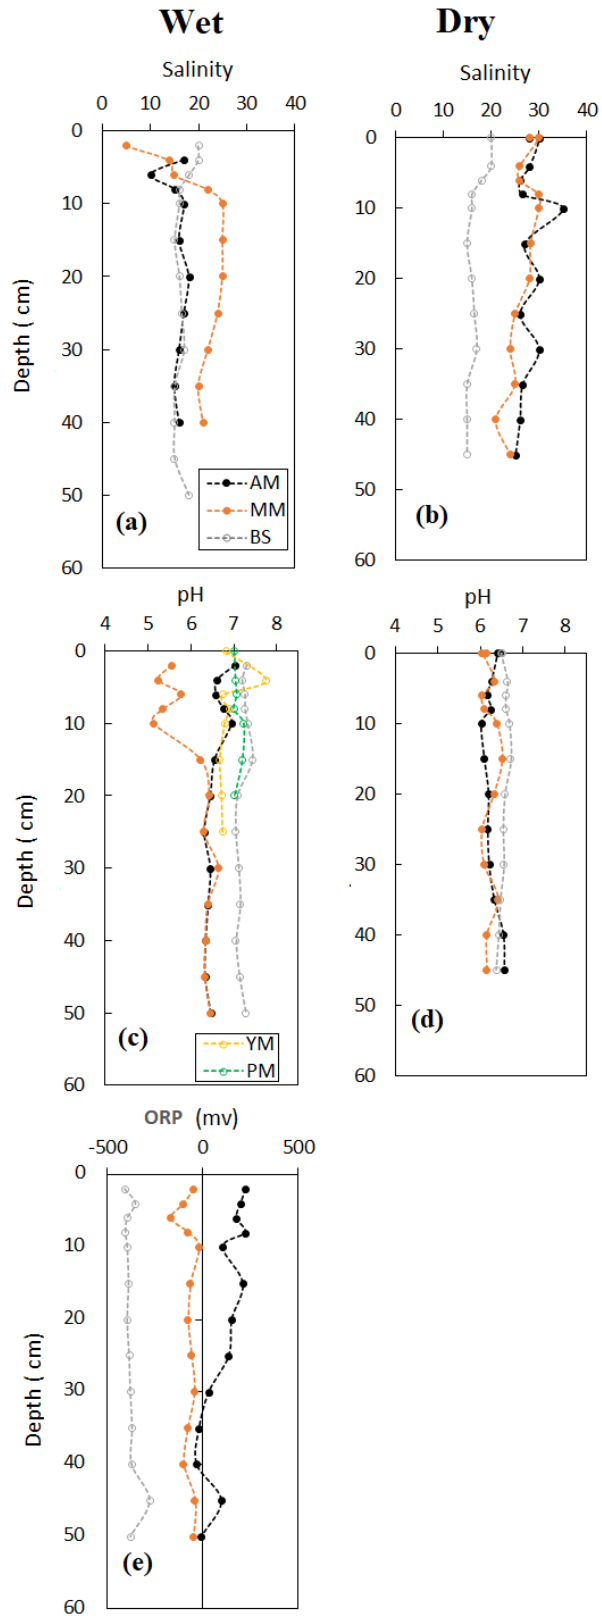

32

33 Fig. S1. Vertical profiles of sedimentary physicochemical properties during dry and wet season

34

35

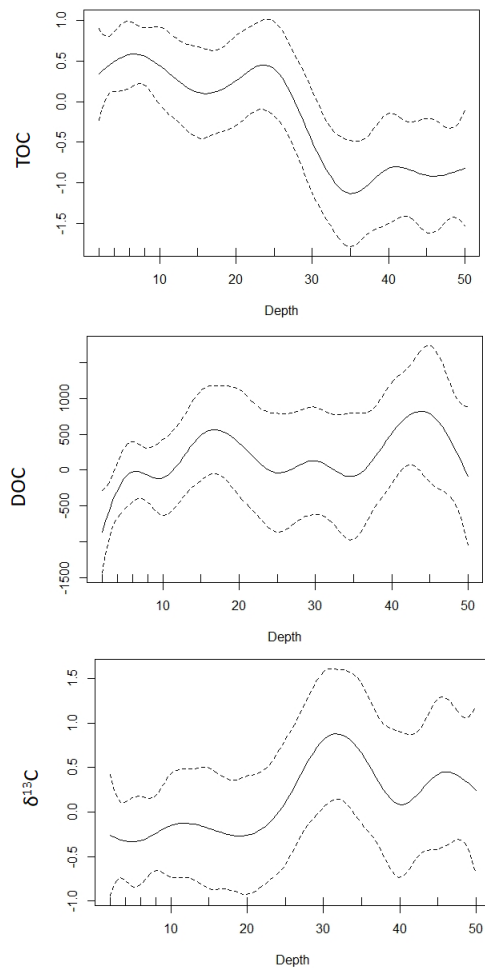

36

37

38 Fig. S2. Distribution of each carbon parameter based on general additive model (GAM) for TOC,  
39 DOC and  $\delta^{13}\text{C}$  with smooth term of depth. Solid and dashed lines represent Mean and SD,  
40 respectively.

41

42

43

44

45

46

47

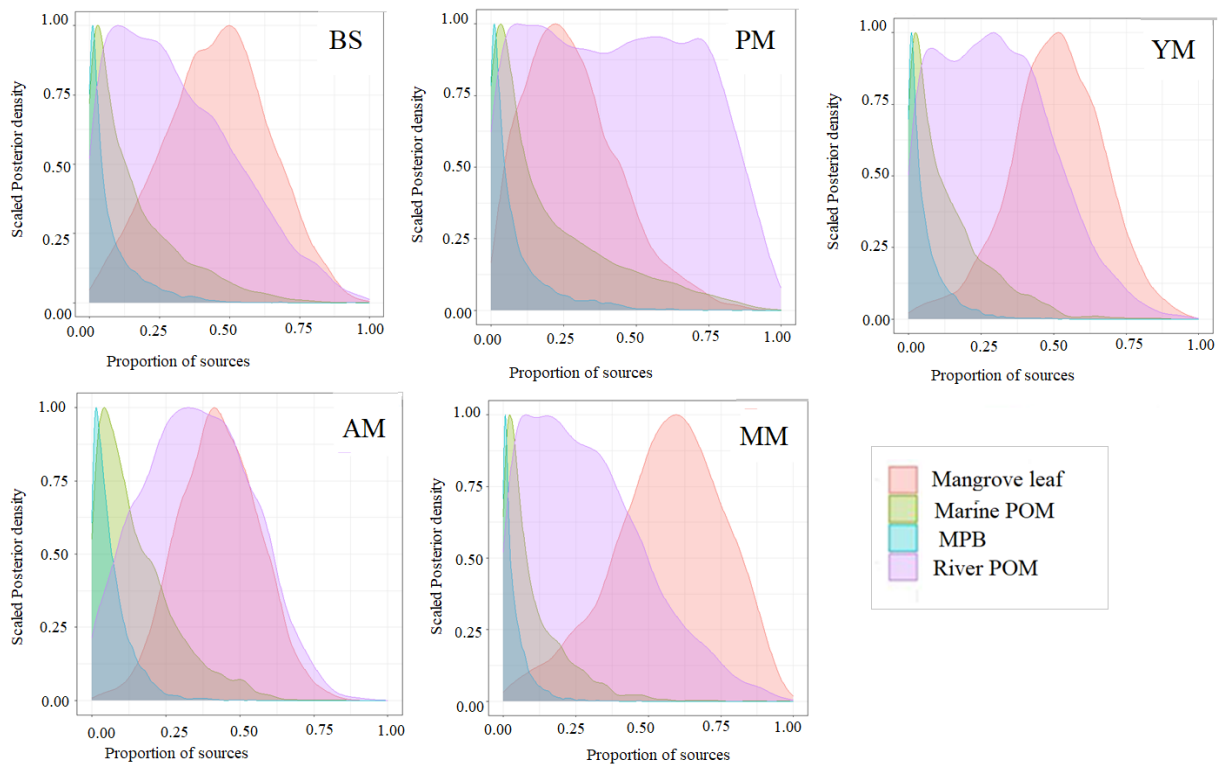

49

50

51 Fig. S3 Source apportionment of sedimentary organic matter at different mangrove stages by  
 52 applying bayesian mixing model with  $\delta^{13}\text{C}$  and OC:TN. This is a density plot against proportion  
 53 of sources. Here, the total area in each curve exceeds 1.0 since this is Scaled-Density adjusted for  
 54 a maximum peak of 1.0. MixSIAR outputs the Scaled-Density instead of original density. The  
 55 Scaled-Density shows a same visual pattern as original density plot.

56

57

58
